# Supplementary material for: Highly efficient and stable dye-sensitized solar cells based on SnO2nanocrystals prepared by microwave-assisted synthesis
Source: Royal Society of Chemistry journal article supplement (doi:10.1039/c1ee02115j), 2011-12-01
Supplement: c1ee02115j.pdf [file c1ee02115j.pdf]

# Supporting Information

## Highly Efficient and Stable Dye-Sensitized Solar Cells Based on SnO<sub>2</sub> Nanocrystals Prepared by Microwave-Assisted Synthesis

Alexander Birkel<sup>a#</sup>, Yong-Gun Lee<sup>b#</sup>, Dominik Koll<sup>a#</sup>, Xavier Van Meerbeek<sup>a</sup>,  
Stefan Frank<sup>a</sup>, Mi Jin Choi<sup>c</sup>, Yong Soo Kang<sup>\*c</sup>, Kookheon Char<sup>\*b</sup> and Wolfgang Tremel<sup>\*a</sup>

Received (in XXX, XXX) Xth XXXXXXXXXX 20XX, Accepted Xth XXXXXXXXXX 20XX

DOI: 10.1039/b000000x

<sup>a</sup>*Institute of Inorganic Chemistry and Analytical Chemistry, Johannes Gutenberg-University,  
Duesbergweg 10-14, D-55099 Mainz, Germany*

<sup>b</sup>*School of Chemical and Biological Engineering, Seoul National University, Seoul 151-744,  
Korea*

<sup>c</sup>*Department of Energy Engineering, Hanyang University, Seoul 133-791, Korea*

\*To whom correspondence should be addressed. E-mail: [khchar@plaza.snu.ac.kr](mailto:khchar@plaza.snu.ac.kr),  
[angys@hanyang.ac.kr](mailto:angys@hanyang.ac.kr) and [tremel@uni-mainz.de](mailto:tremel@uni-mainz.de). <sup>#</sup>All authors contributed equally to this  
manuscript.

## Results and Discussion

**Table S1.** Refined crystallite sizes derived from the full pattern profile fits. The errors correspond to the threefold of the e.s.d. values.

| <b>Sample</b>                     | <b>Cs_A /nm</b> | <b>Cs_B /nm</b> | <b>Cs_C /nm</b> |
|-----------------------------------|-----------------|-----------------|-----------------|
| <b>Na<sup>+</sup></b>             | 14.9 ± 0.27     | 16.5 ± 0.30     | 34.7 ± 0.57     |
| <b>K<sup>+</sup></b>              | 25.5 ± 0.69     | 28.4 ± 0.75     | 43.7 ± 1.20     |
| <b>TMAH</b>                       | 10.0 ± 0.24     | 13.2 ± 0.27     | 27.3 ± 0.54     |
| <b>NH<sub>4</sub><sup>+</sup></b> | 8.7 ± 0.12      | 9.7 ± 0.12      | 8.7 ± 0.15      |

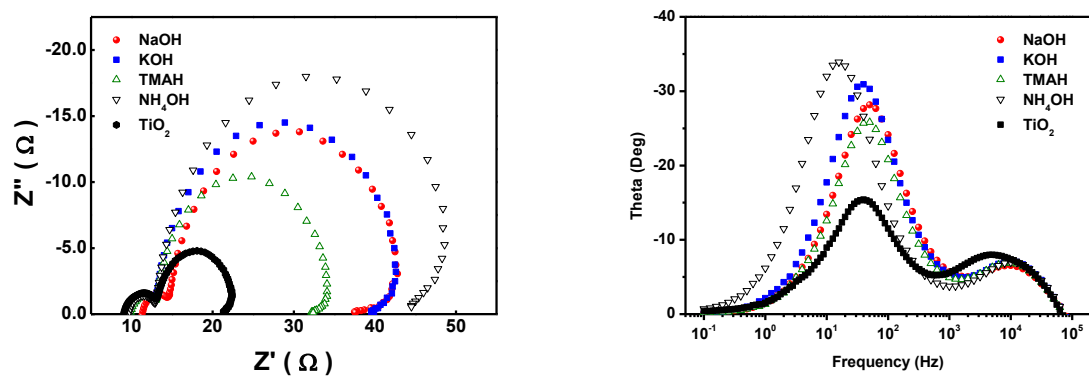

**Figure S2.** (a) Nyquist and (b) Bode plot of DSSCs with SnO<sub>2</sub> photoanodes under 1 sun illumination with bias of open-circuit voltage.
